# Supplementary material for: Anti-inflammatory activity of the dietary supplement Houttuynia cordata fermentation product in RAW264.7 cells and Wistar rats
Source: PubMed Central journal article supplement (PMC7094840; doi:10.1371/journal.pone.0230645), 2020-03-25
Supplement: pone.0230645.s002.pdf [file pone.0230645.s002.pdf]

The images of mRNA expression were captured by Gel Documentation and analyzed by automated imaging (Bio Rad).

### iNOS mRNA expression

HCFP aqueous extract

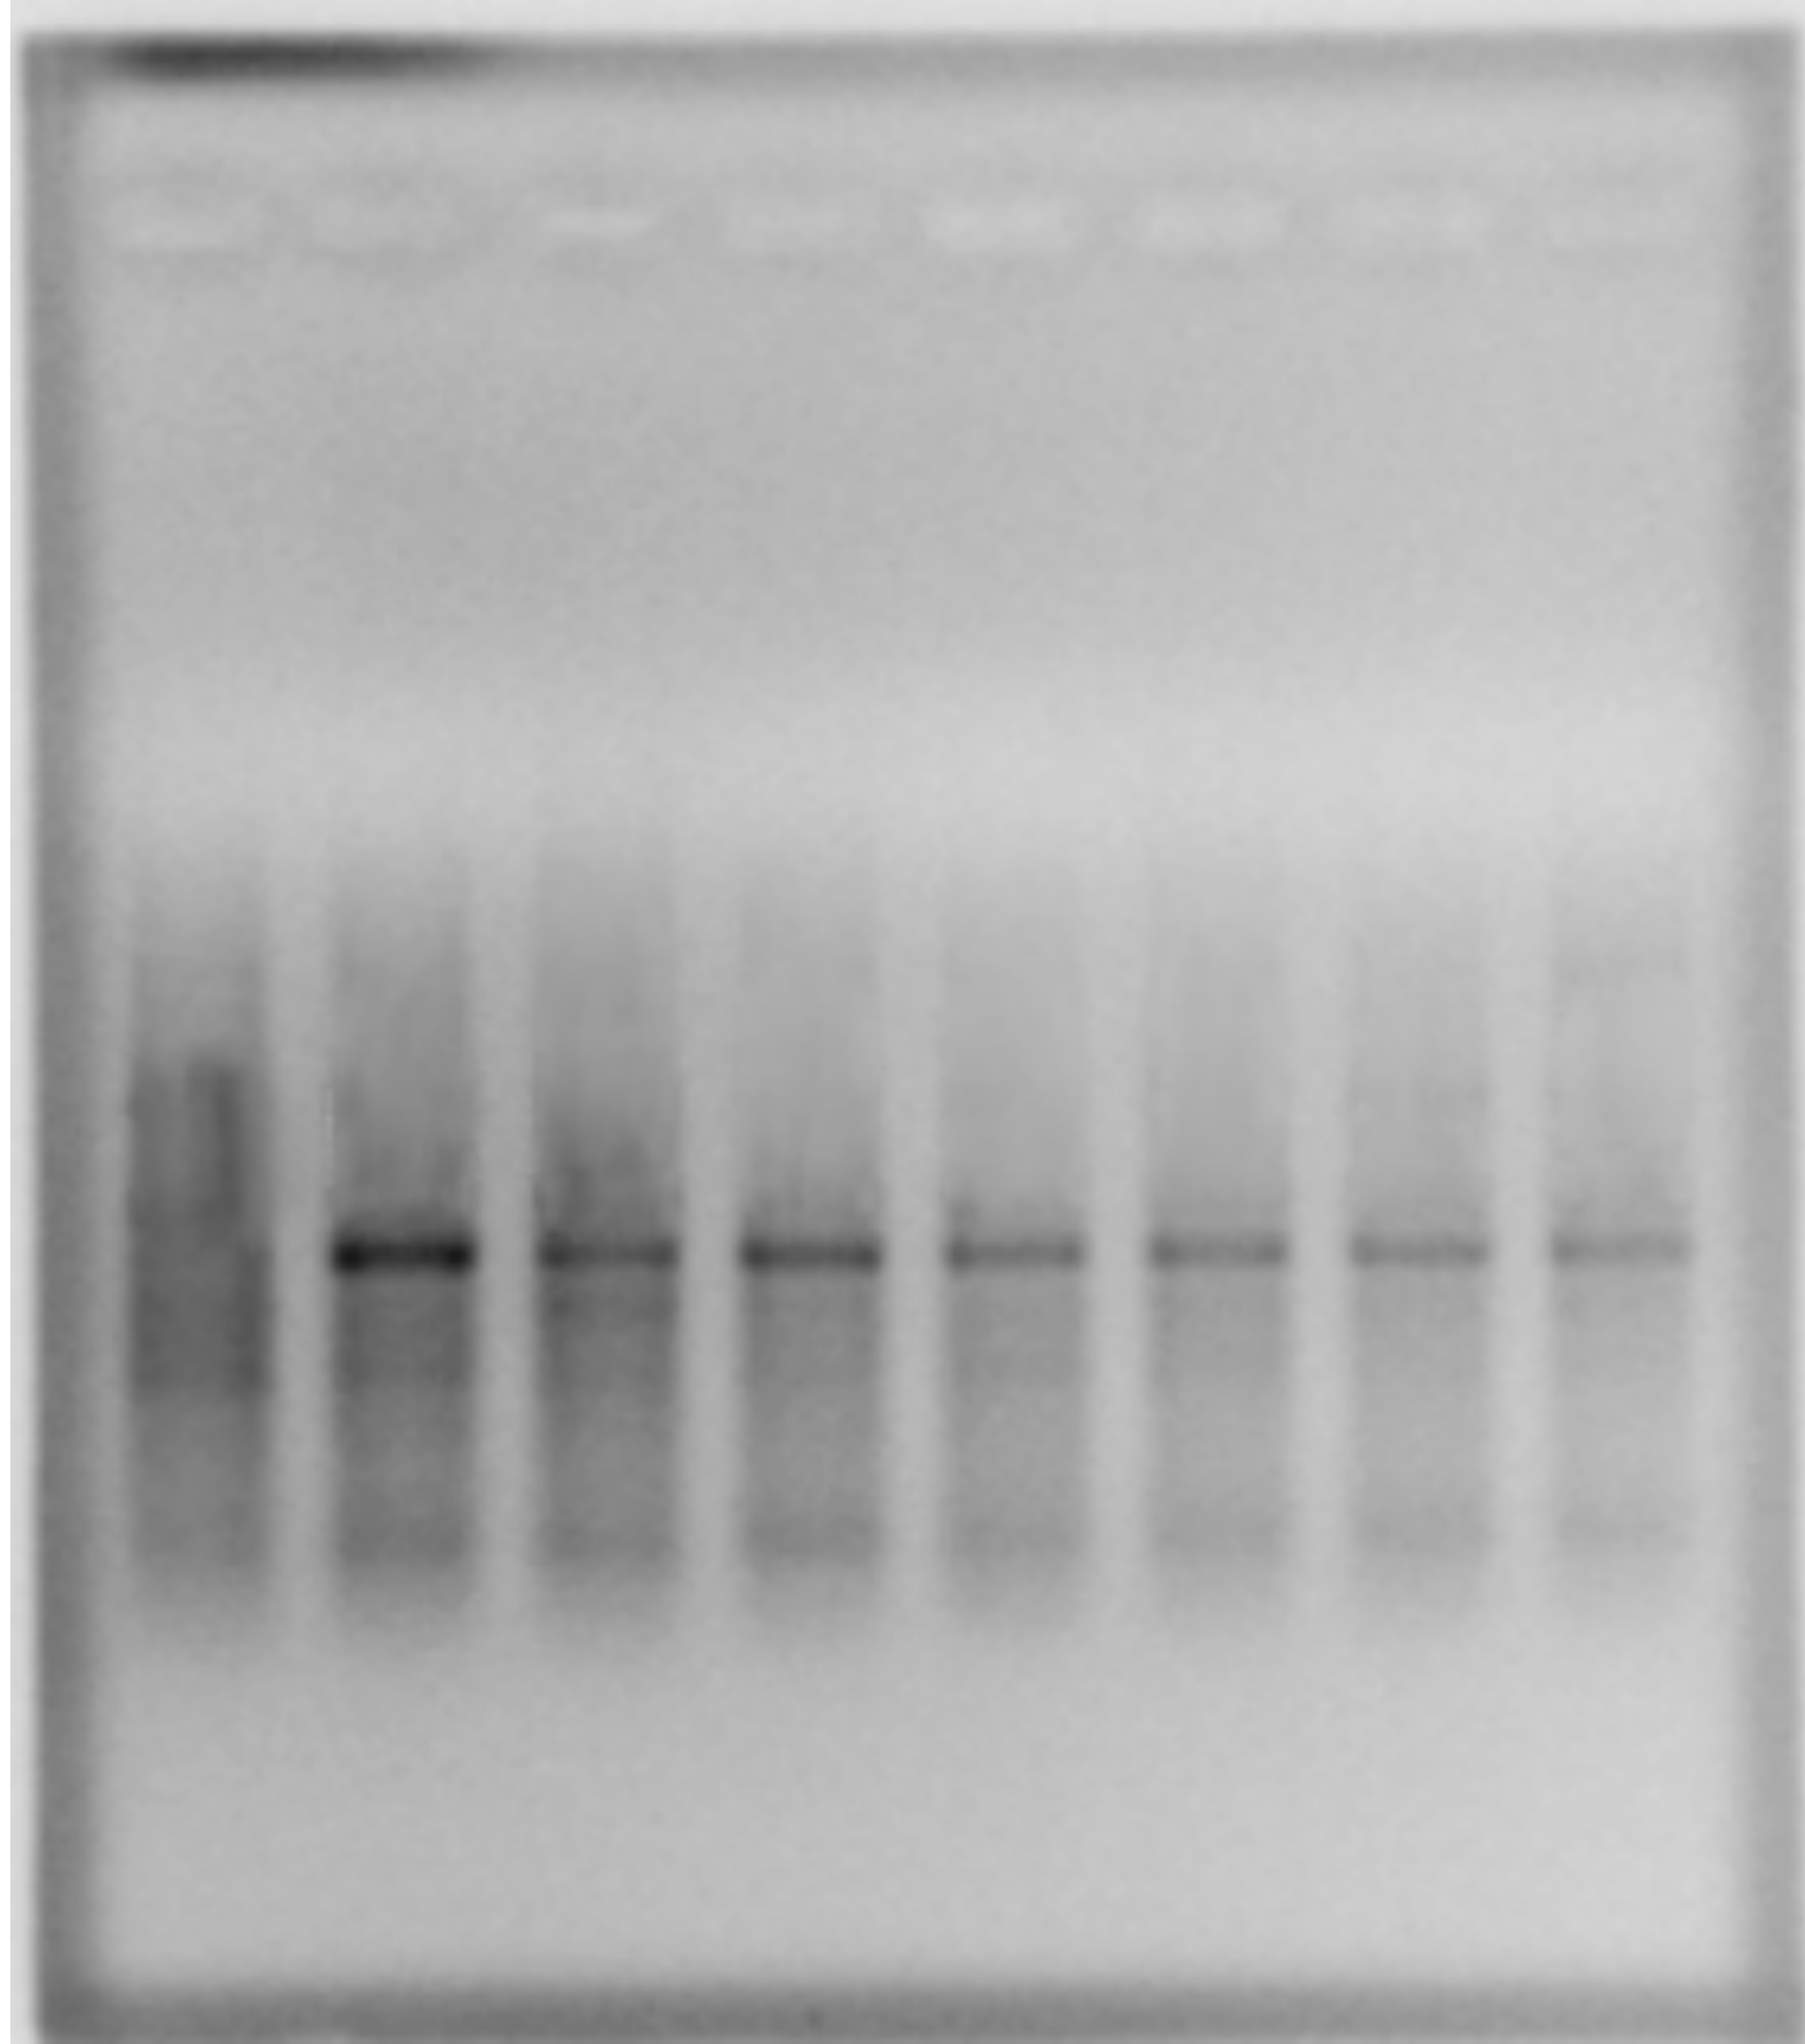

HCFP methanolic extract

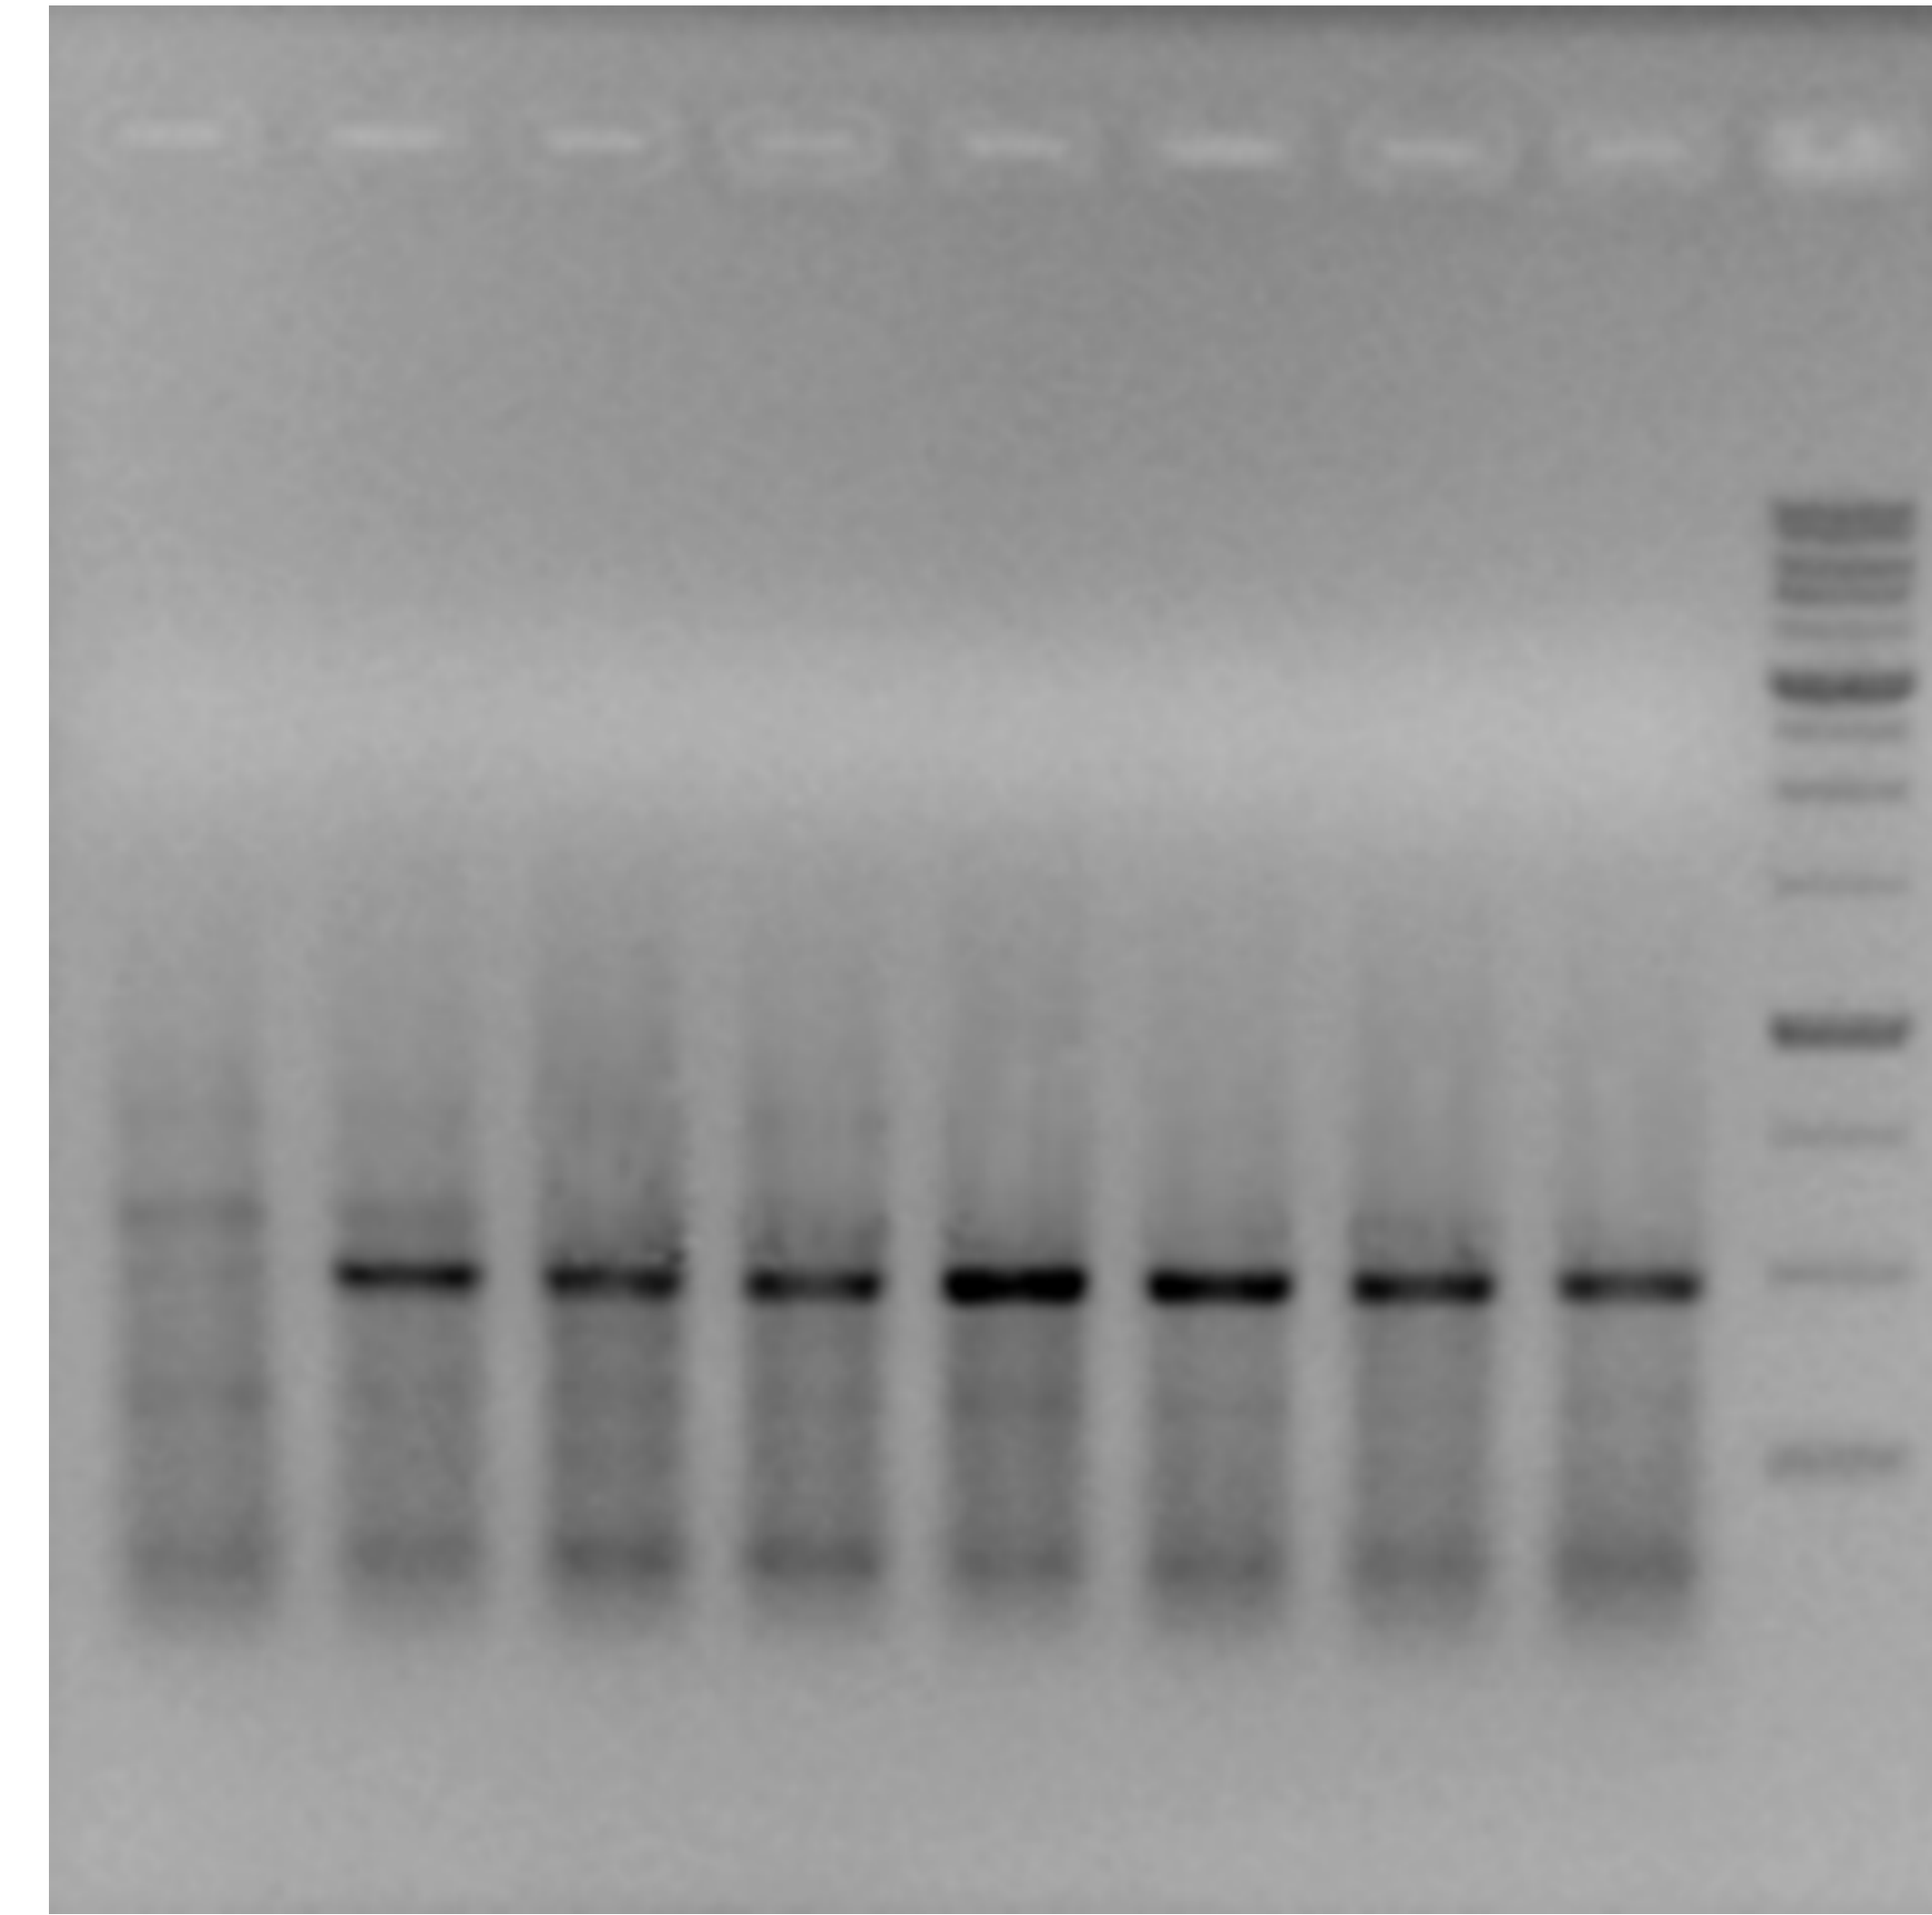

| HCFP aqueous extract (µg/mL) | - | - | - | 25 | 50 | 250 | 550 | 750 |
|------------------------------|---|---|---|----|----|-----|-----|-----|
| LPS (1 µg/mL)                | - | + | + | +  | +  | +   | +   | +   |
| DCF (25 µg/mL)               | - | - | + | -  | -  | -   | -   | -   |

| HCFP methanolic extract (µg/mL) | - | - | - | 4 | 6 | 8 | 10 | 12 |
|---------------------------------|---|---|---|---|---|---|----|----|
| LPS (1 µg/mL)                   | - | + | + | + | + | + | +  | +  |
| DCF (25 µg/mL)                  | - | - | + | - | - | - | -  | -  |

### COX-2 mRNA expression

HCFP aqueous extract

HCFP methanolic extract

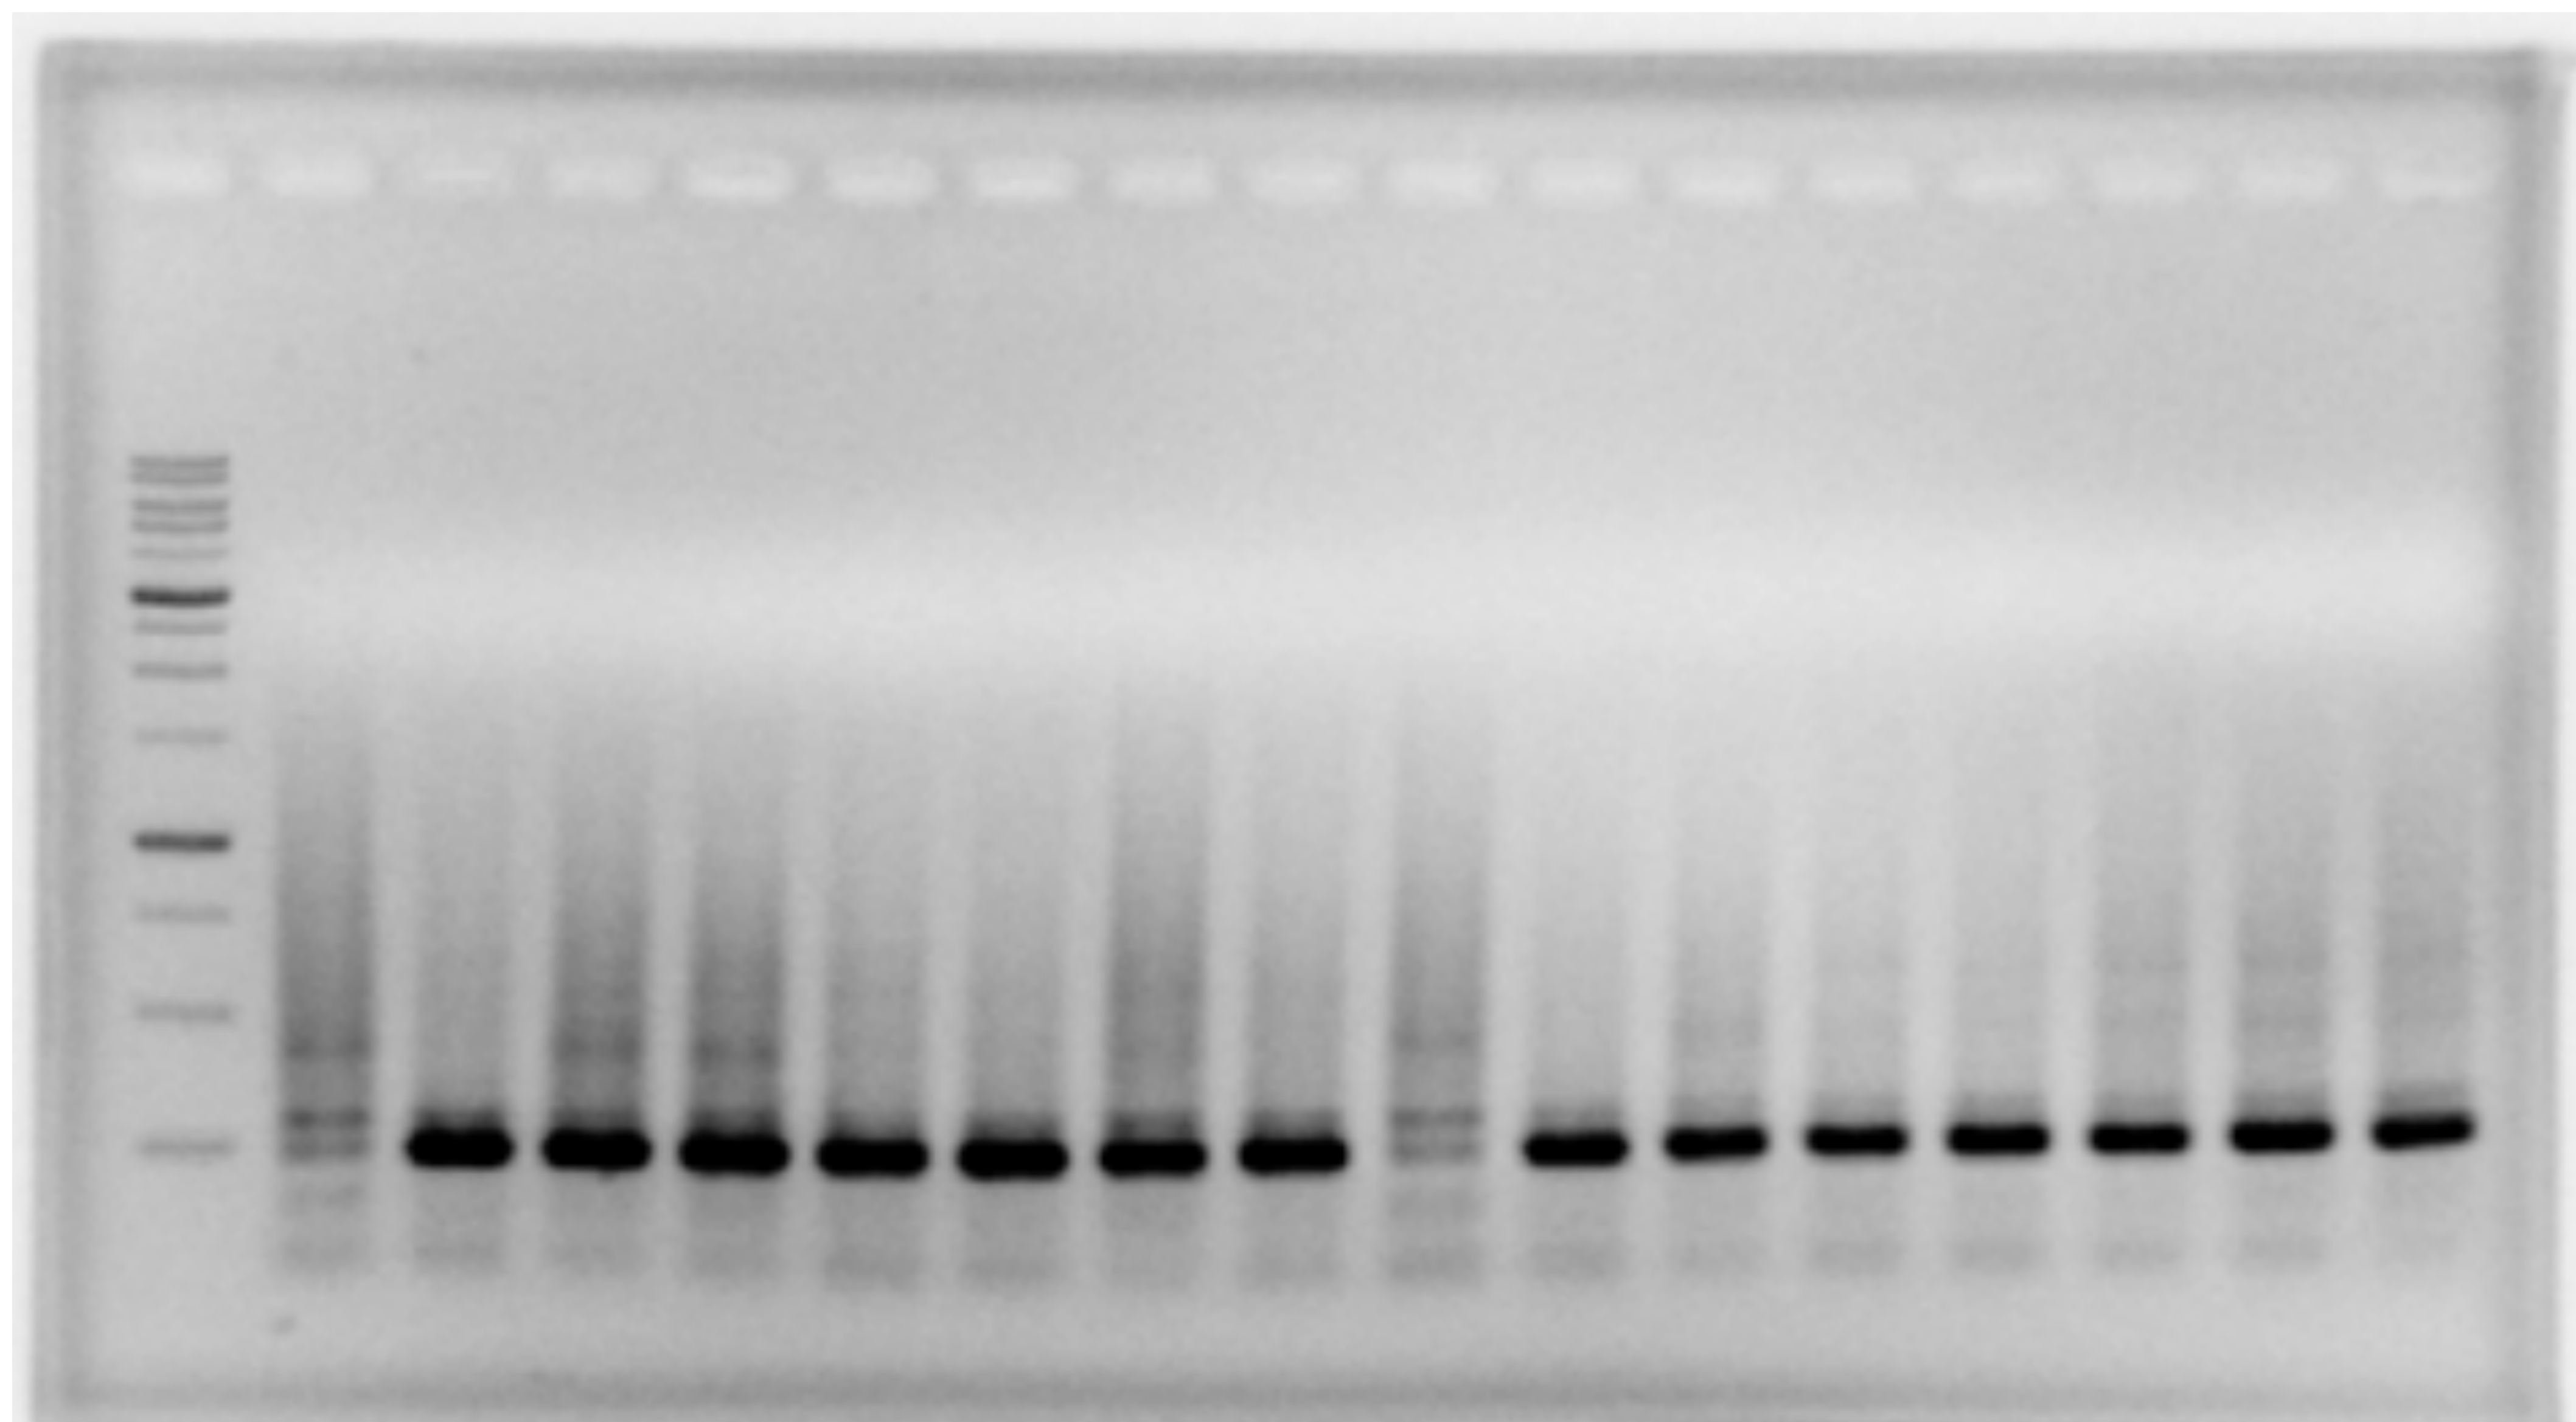

| HCFP aqueous extract (µg/mL) | - | - | - | 25 | 50 | 250 | 550 | 750 | - | - | - | 4 | 6 | 8 | 10 | 12 | HCFP methanolic extract (µg/mL) |
|------------------------------|---|---|---|----|----|-----|-----|-----|---|---|---|---|---|---|----|----|---------------------------------|
| LPS (1 µg/mL)                | - | + | + | +  | +  | +   | +   | +   | - | + | + | + | + | + | +  | +  | LPS (1 µg/mL)                   |
| DCF (25 µg/mL)               | - | - | + | -  | -  | -   | -   | -   | - | - | + | - | - | - | -  | -  | DCF (25 µg/mL)                  |

## IL-1 $\beta$ mRNA expression

HCFP aqueous extract

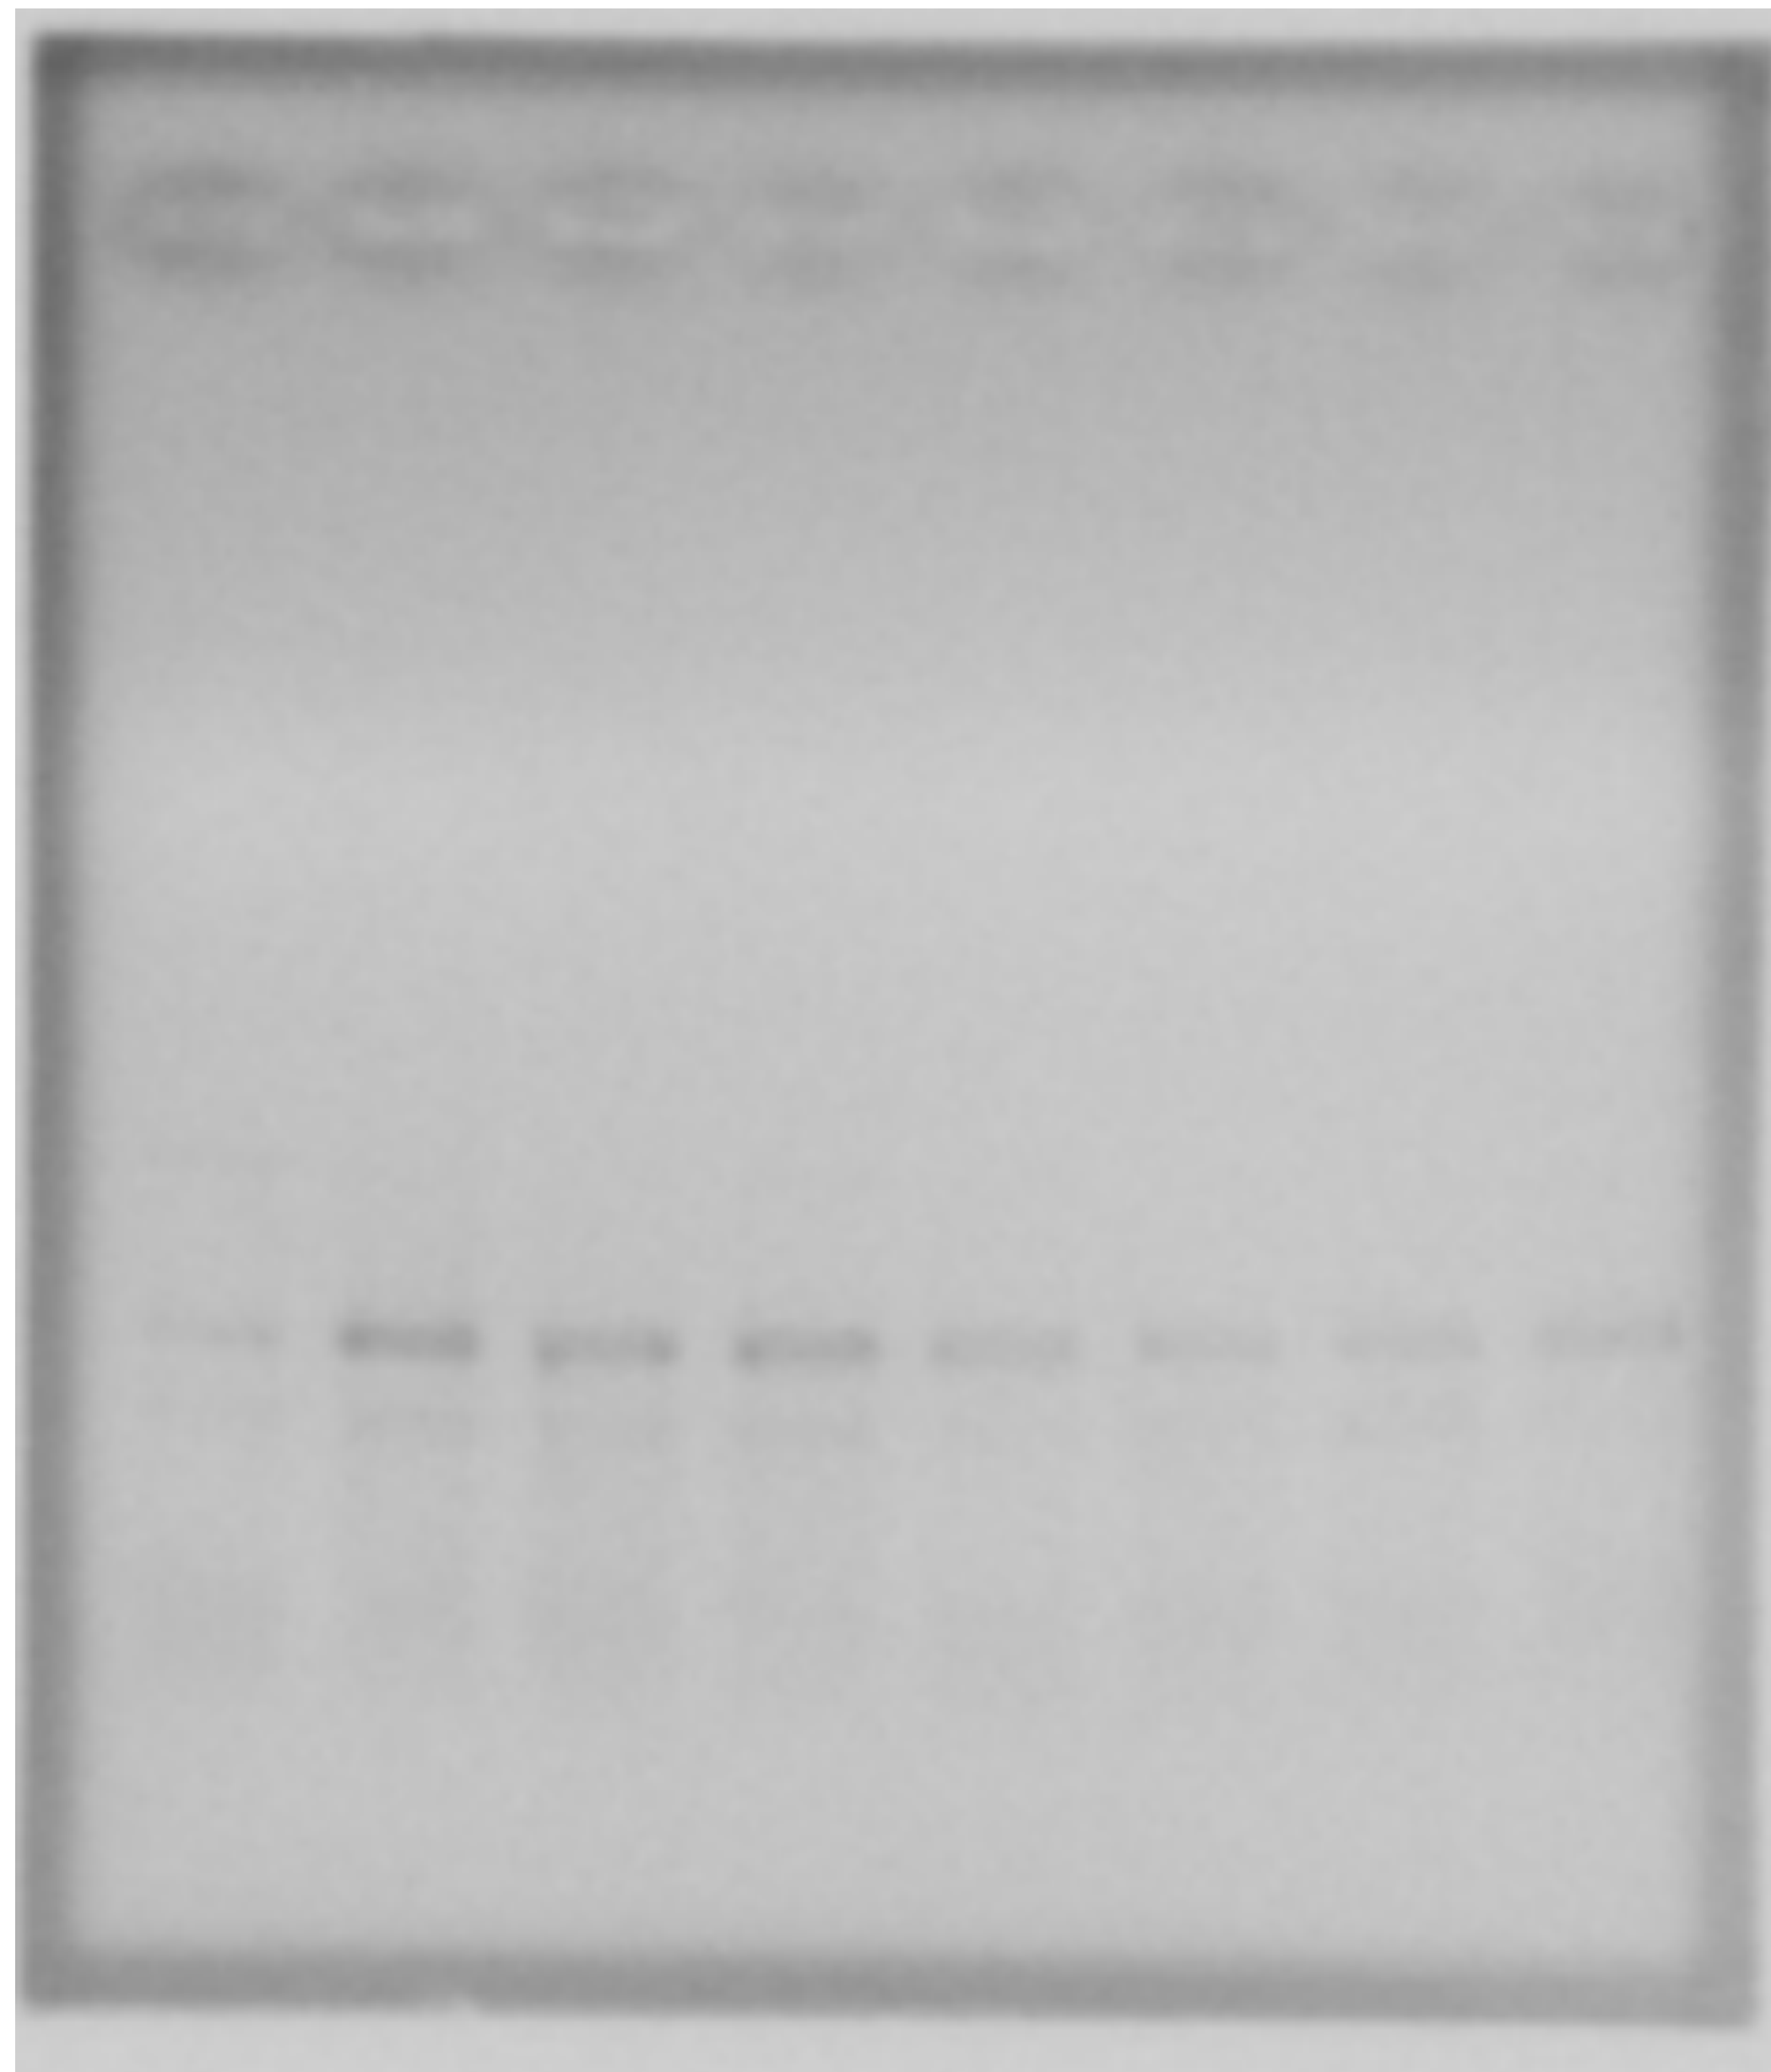

HCFP methanolic extract

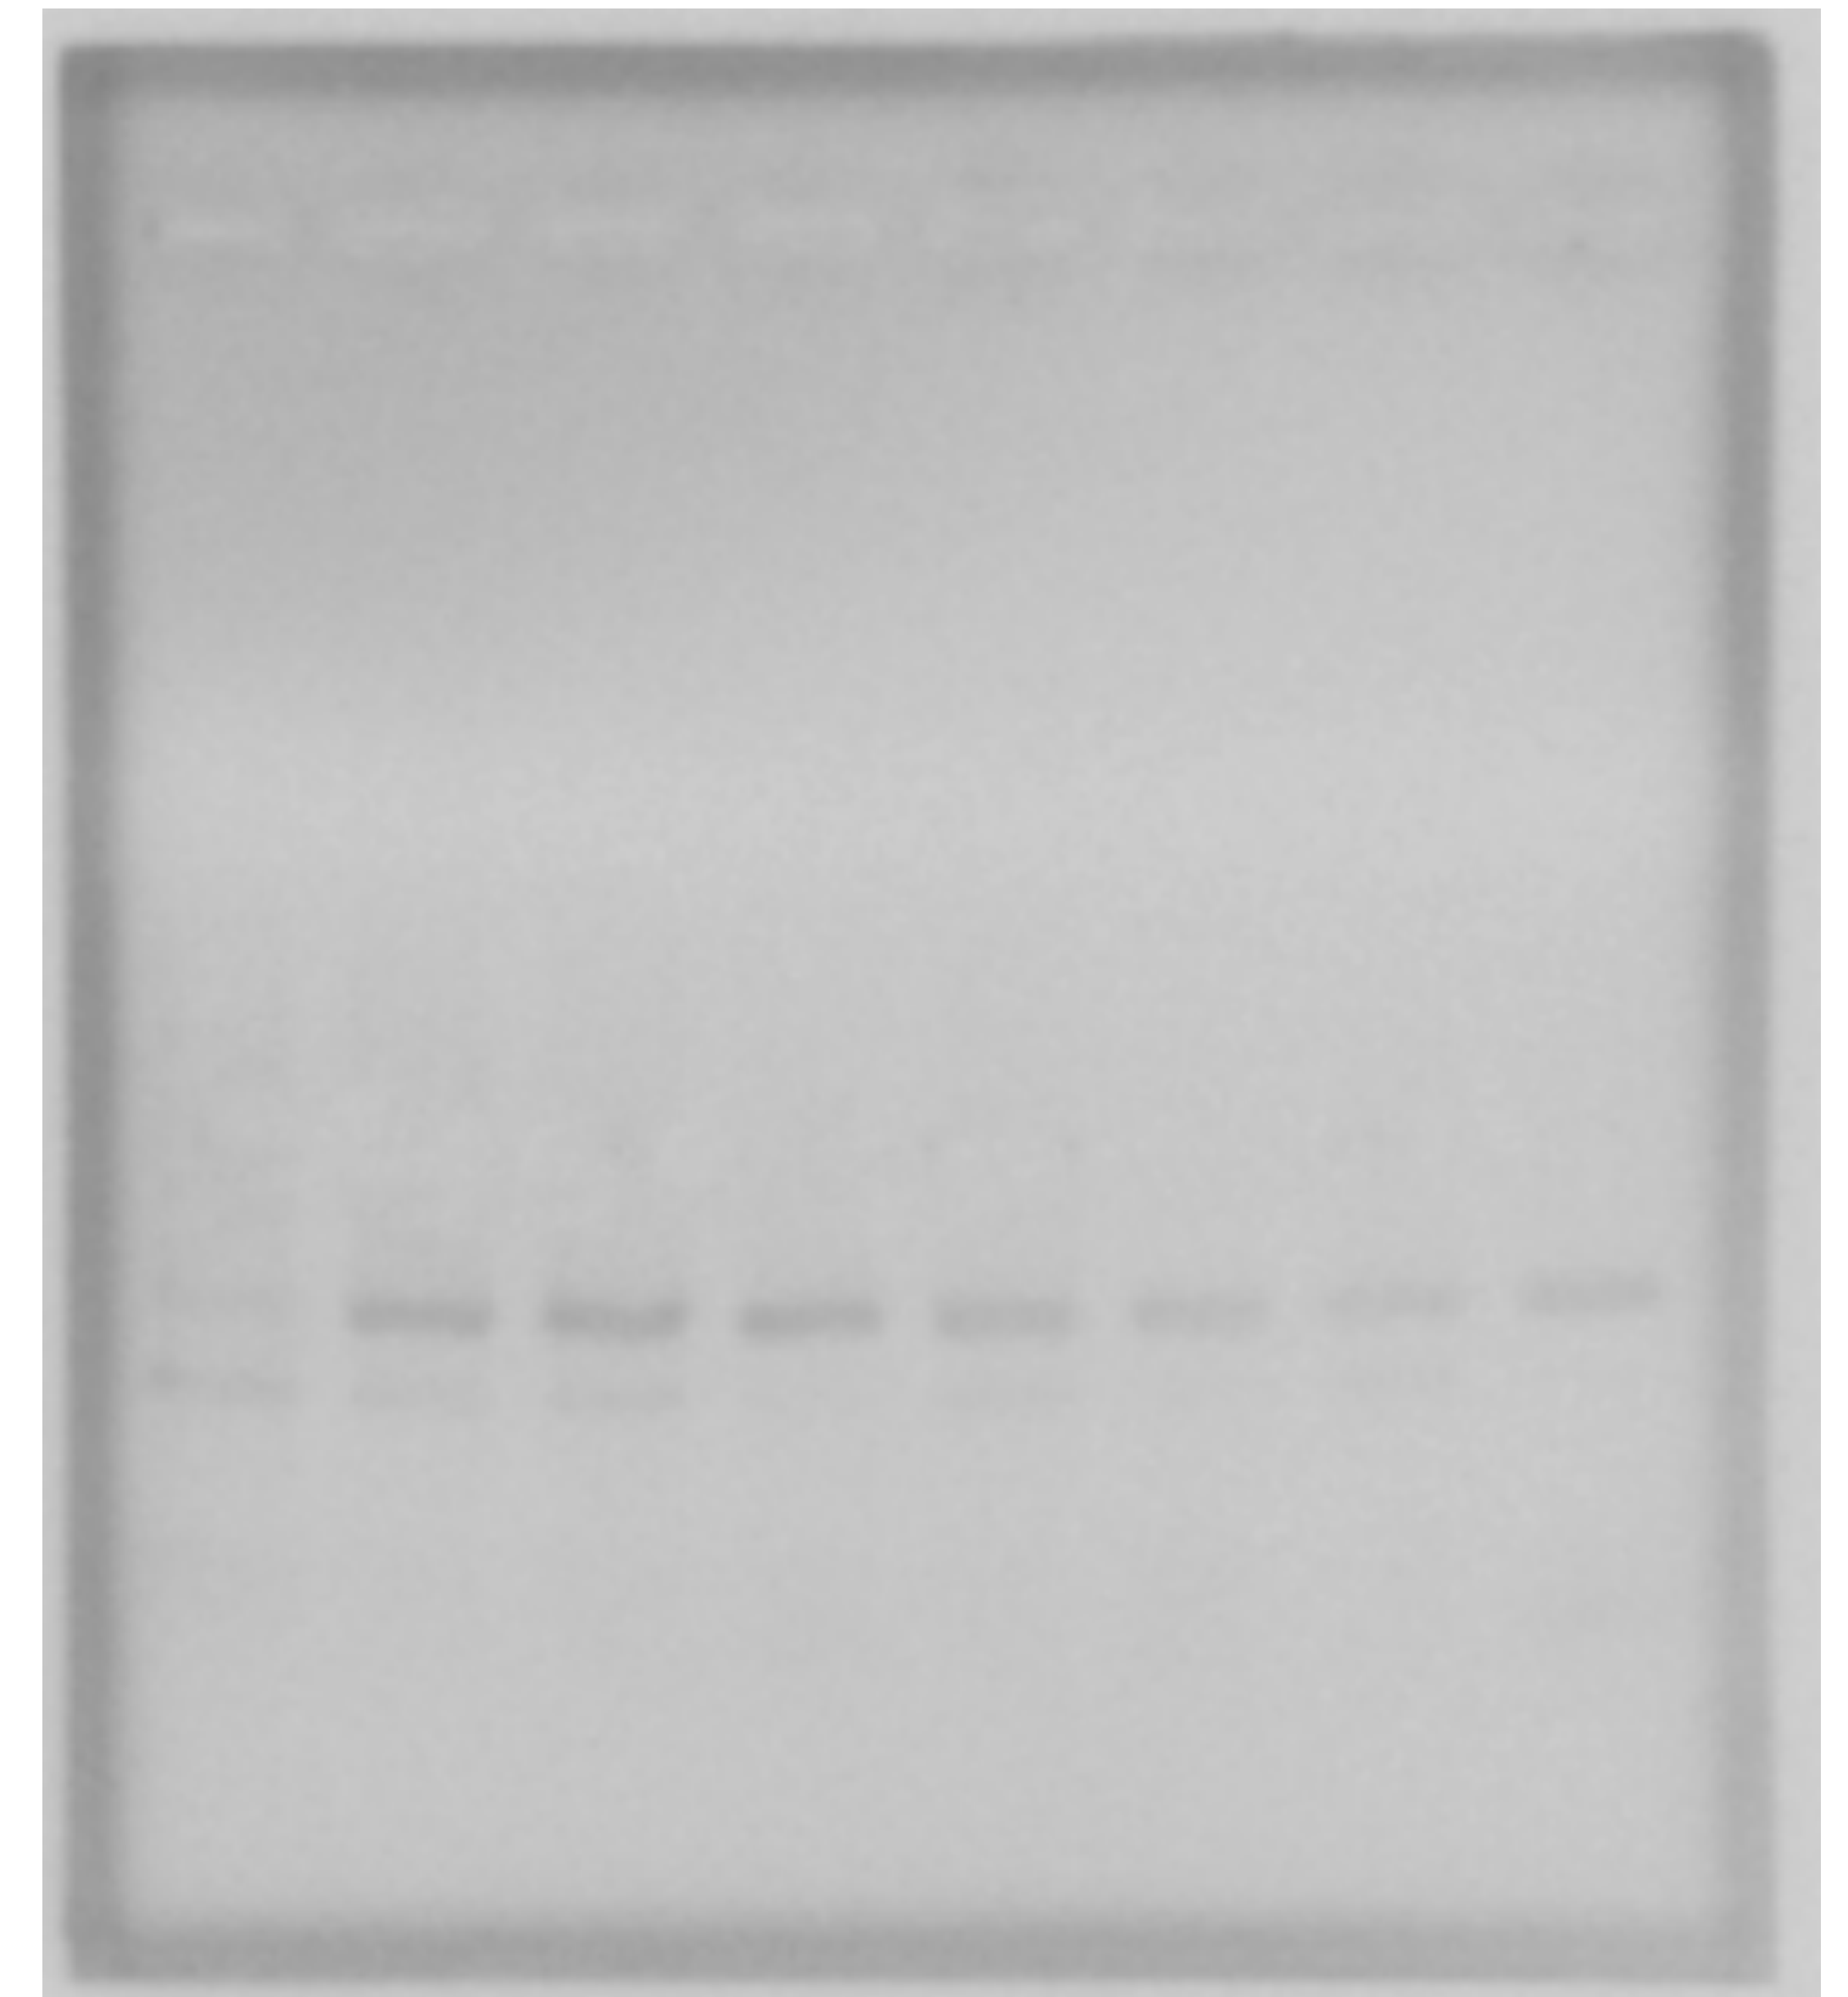

| HCFP aqueous extract (μg/mL) | - | - | - | 25 | 50 | 250 | 550 | 750 |
|------------------------------|---|---|---|----|----|-----|-----|-----|
| LPS (1 μg/mL)                | - | + | + | +  | +  | +   | +   | +   |
| DCF (25 μg/mL)               | - | - | + | -  | -  | -   | -   | -   |

| HCFP methanolic extract (μg/mL) | - | - | - | 4 | 6 | 8 | 10 | 12 |
|---------------------------------|---|---|---|---|---|---|----|----|
| LPS (1 μg/mL)                   | - | + | + | + | + | + | +  | +  |
| DCF (25 μg/mL)                  | - | - | + | - | - | - | -  | -  |

## TNF- $\alpha$ mRNA expression

HCFP aqueous extract

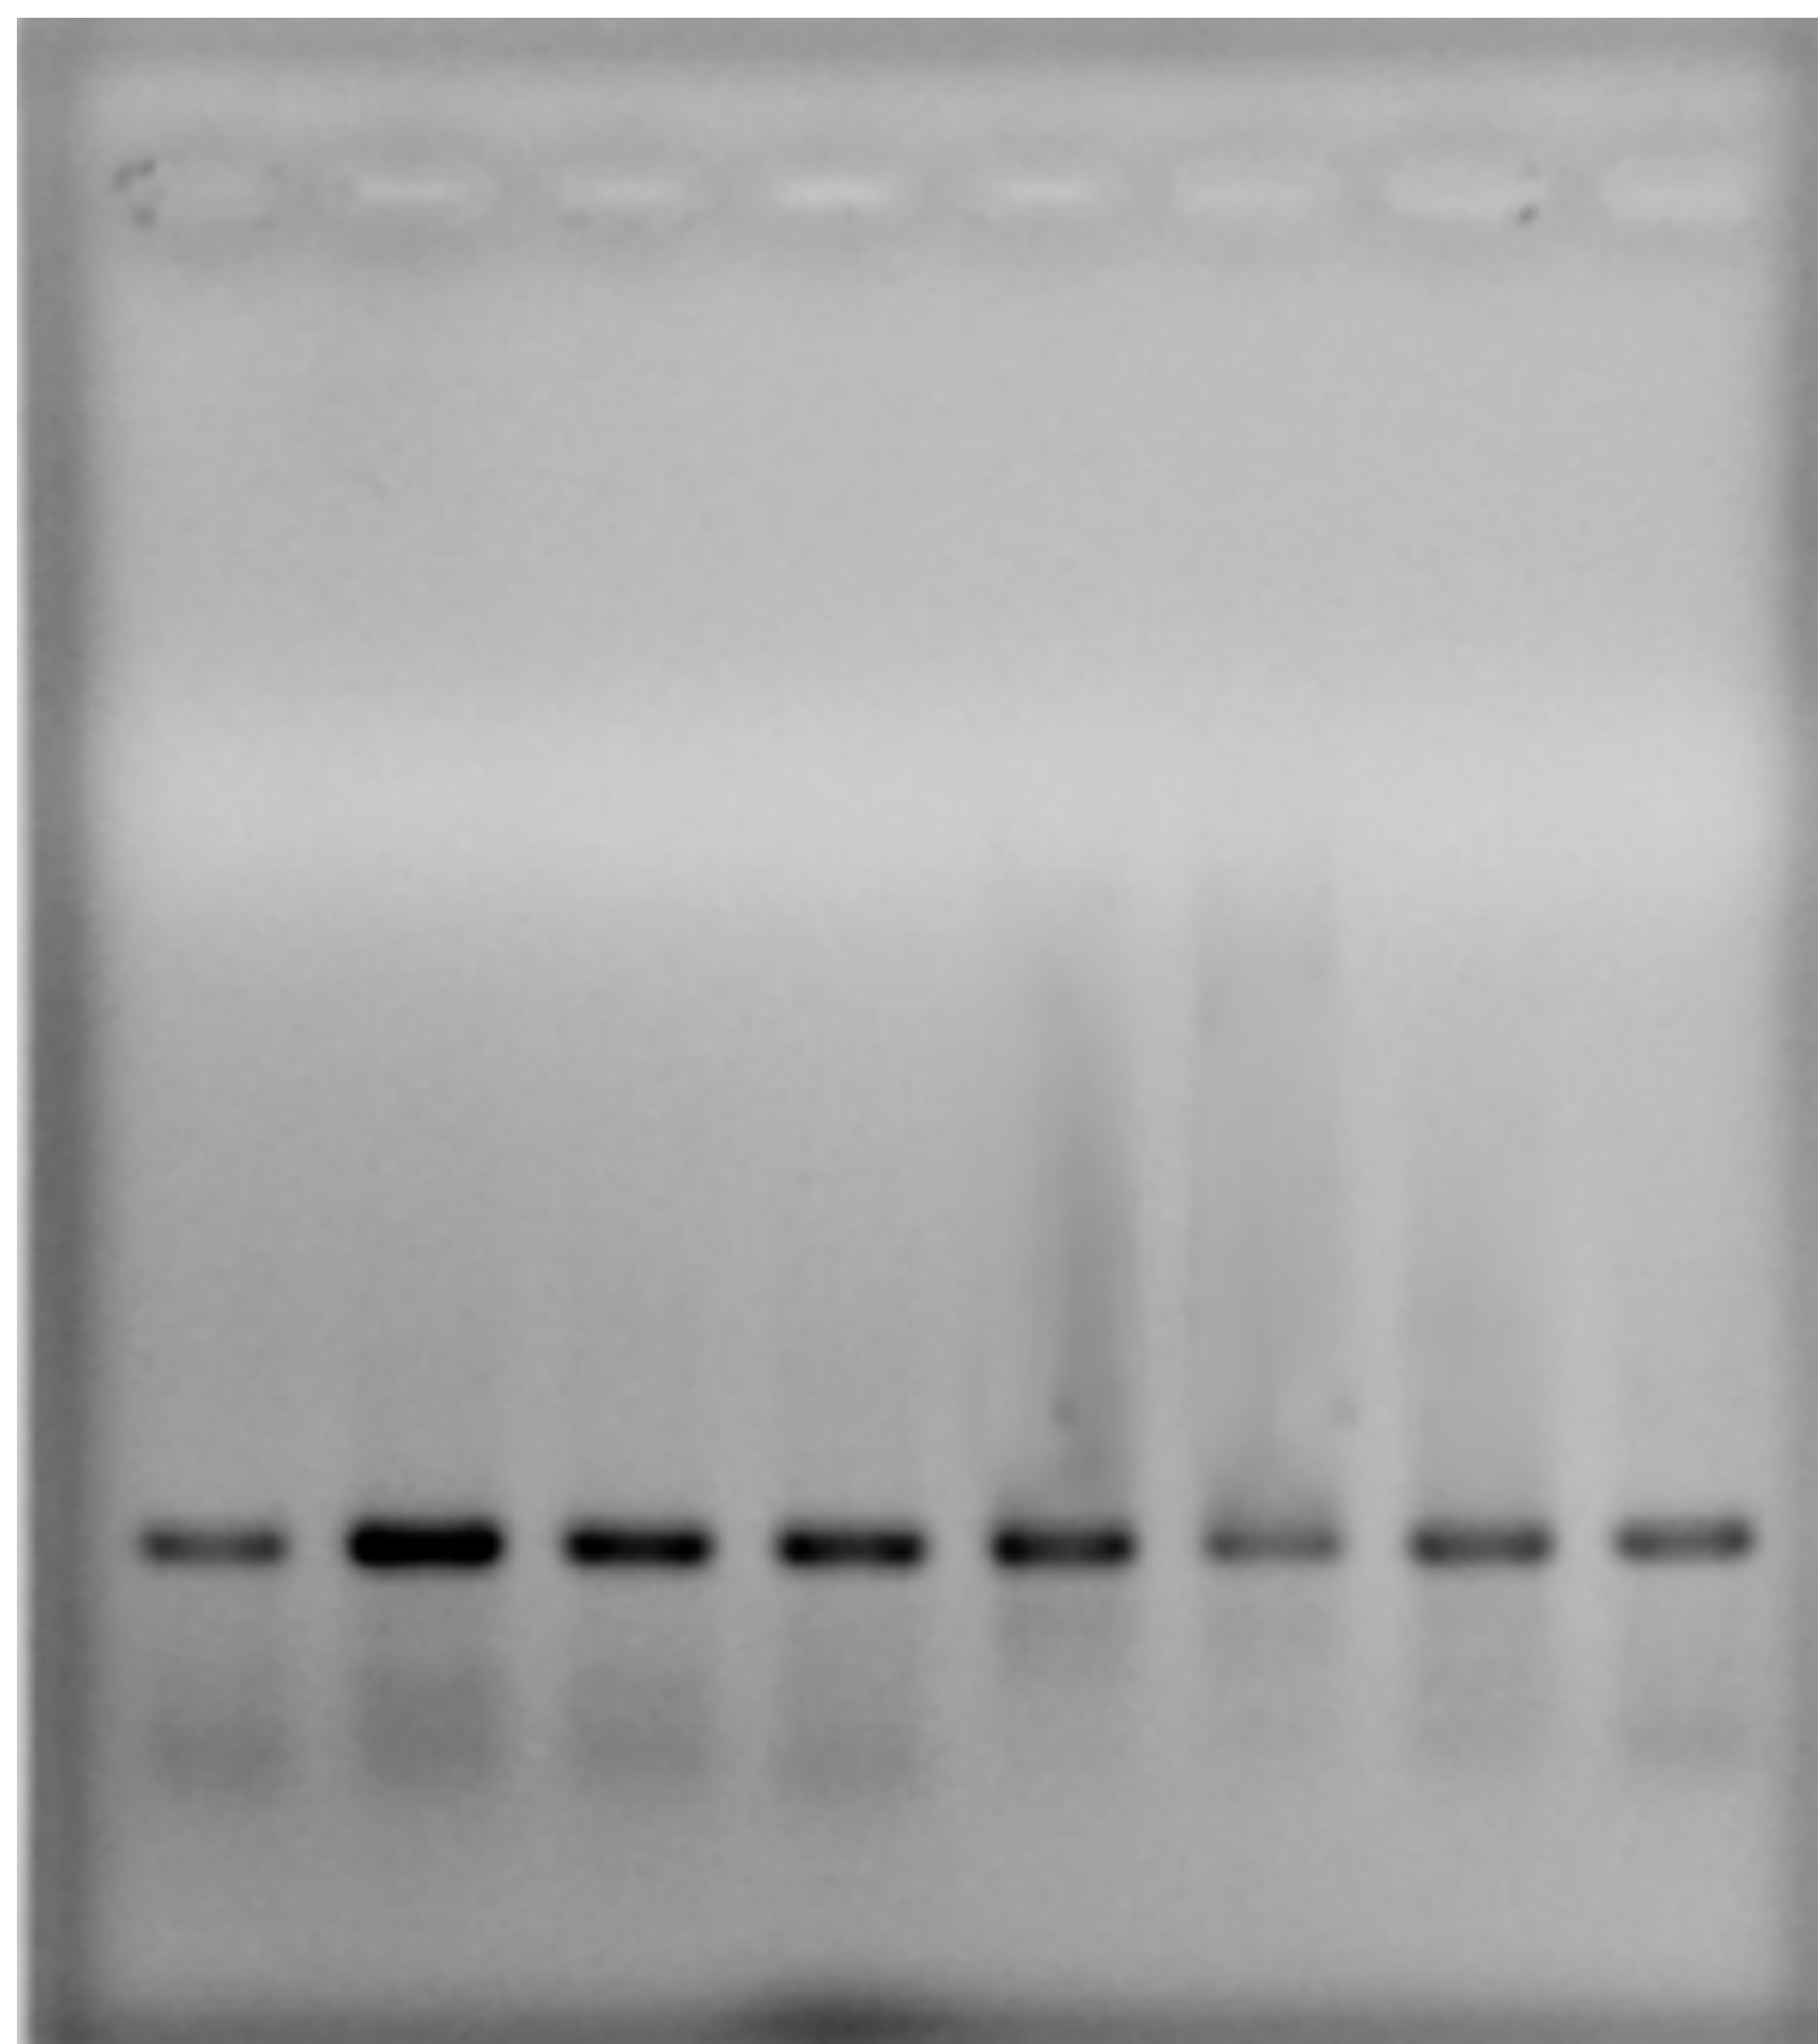

HCFP methanolic extract

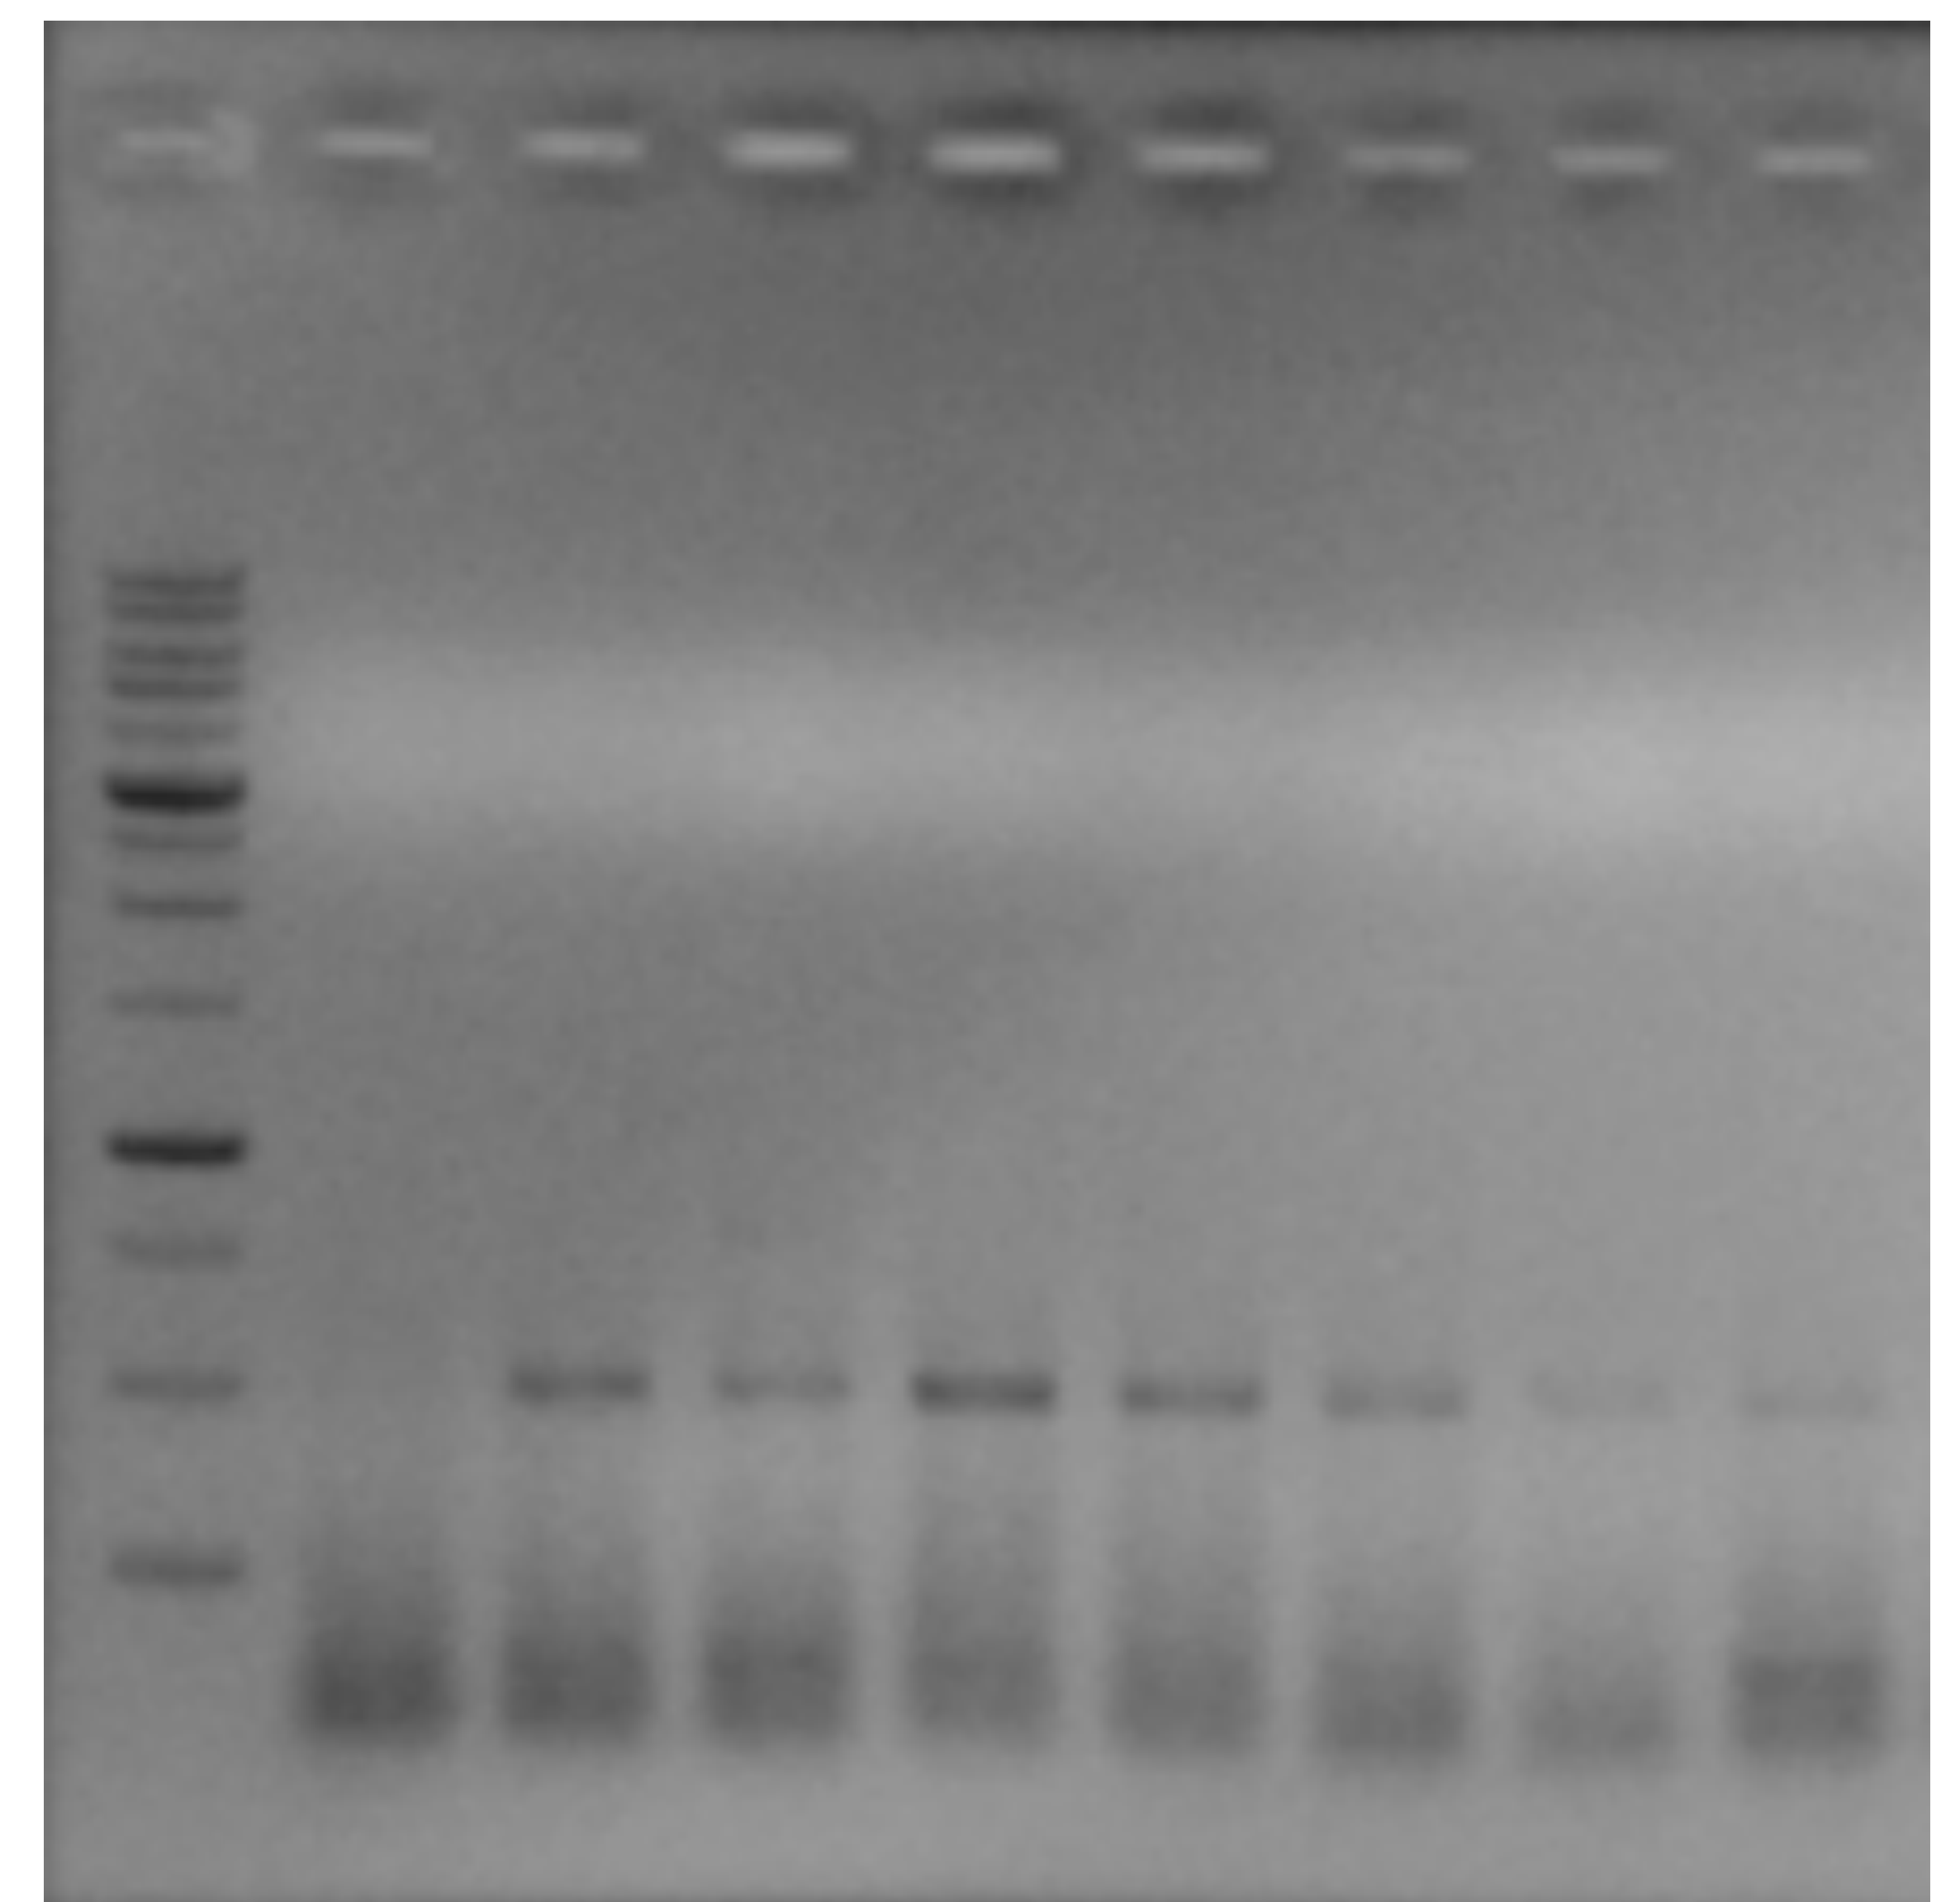

| HCFP aqueous extract (μg/mL) | - | - | - | 25 | 50 | 250 | 550 | 750 |
|------------------------------|---|---|---|----|----|-----|-----|-----|
| LPS (1 μg/mL)                | - | + | + | +  | +  | +   | +   | +   |
| DCF (25 μg/mL)               | - | - | + | -  | -  | -   | -   | -   |

| HCFP methanolic extract (μg/mL) | - | - | - | 4 | 6 | 8 | 10 | 12 |
|---------------------------------|---|---|---|---|---|---|----|----|
| LPS (1 μg/mL)                   | - | + | + | + | + | + | +  | +  |
| DCF (25 μg/mL)                  | - | - | + | - | - | - | -  | -  |







The results of protein expression were visualized using ECL detection reagent and exposed by X-ray film.

### Protein expression

HCFP aqueous extract

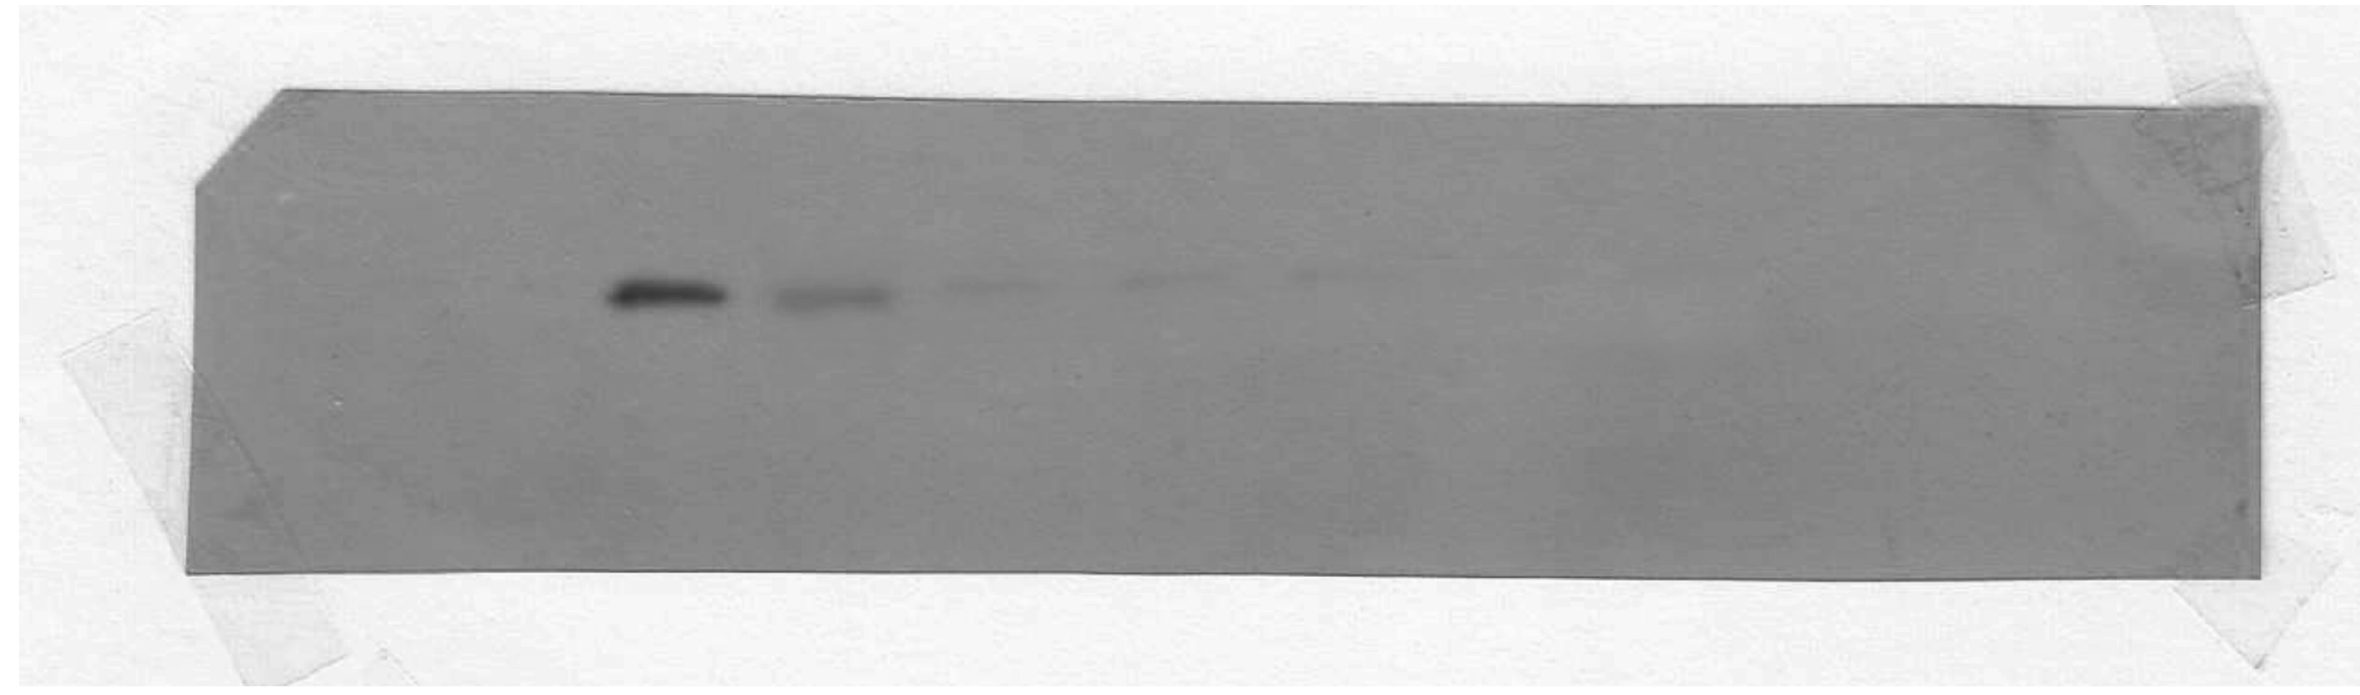

|                              |   |   |    |    |     |     |     |   |
|------------------------------|---|---|----|----|-----|-----|-----|---|
| HCFP aqueous extract (µg/mL) | - | - | 25 | 50 | 250 | 550 | 750 | - |
| LPS (1 µg/mL)                | - | + | +  | +  | +   | +   | +   | + |
| DCF (25 µg/mL)               | - | - | -  | -  | -   | -   | -   | + |

HCFP methanolic extract

iNOS

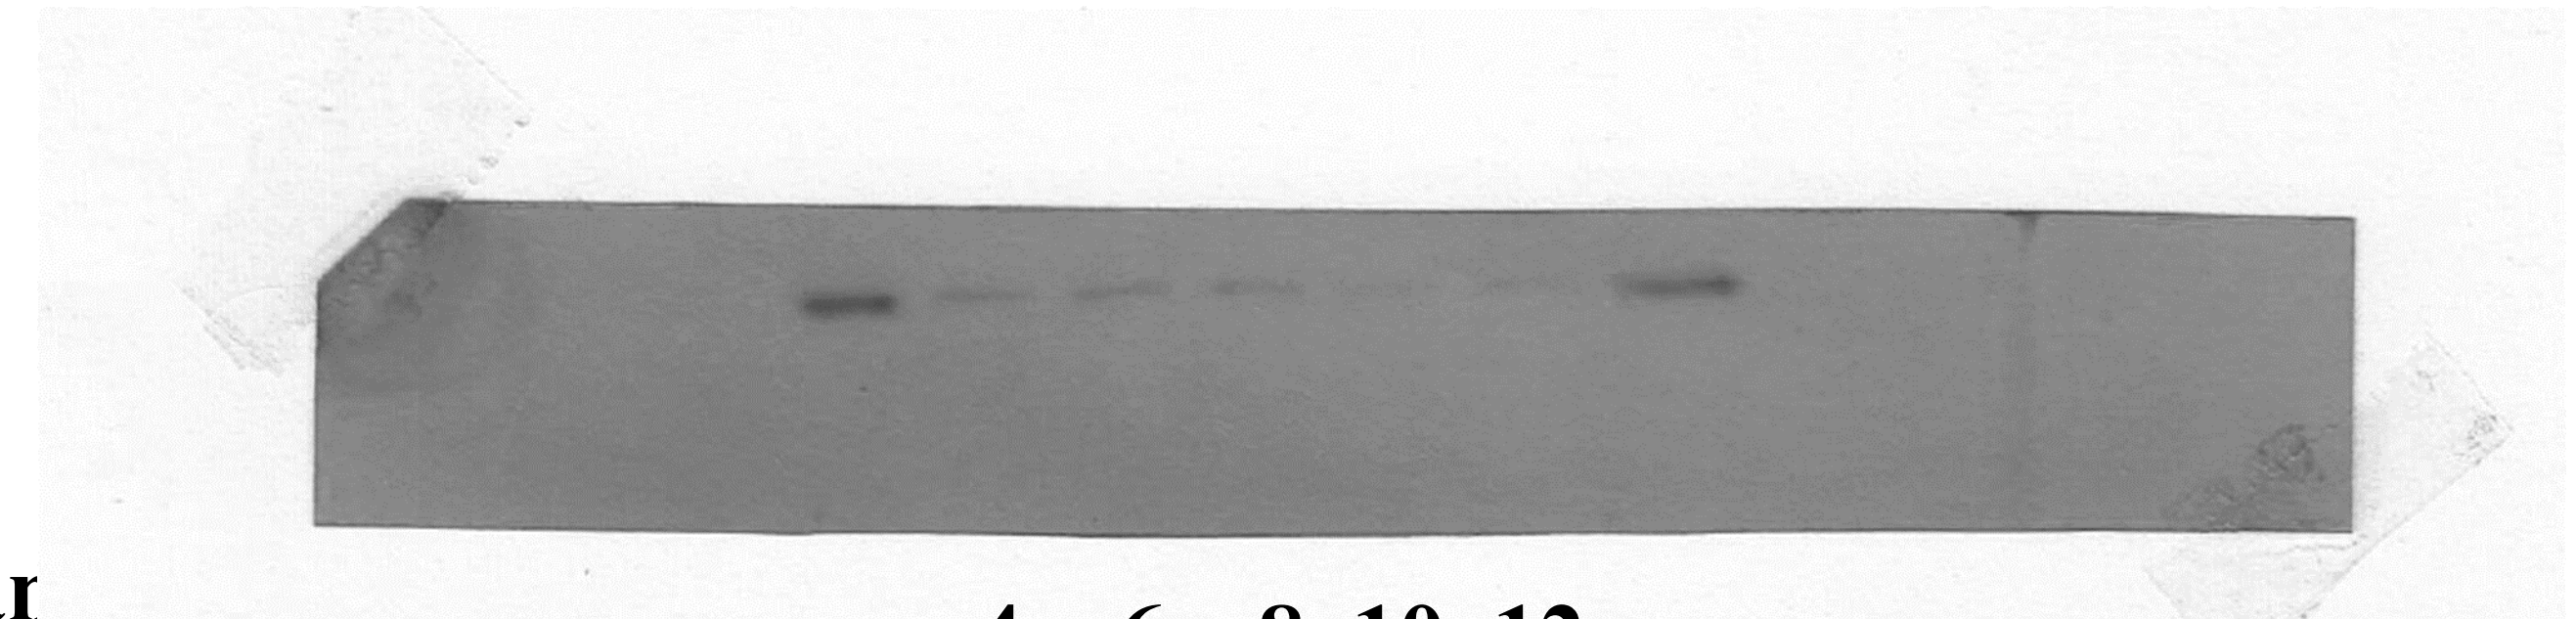

|                     |   |   |   |   |   |    |    |   |
|---------------------|---|---|---|---|---|----|----|---|
| HCFP methar (µg/mL) | - | - | 4 | 6 | 8 | 10 | 12 | - |
| LPS (1 µg/mL)       | - | + | + | + | + | +  | +  | + |
| DCF (25 µg/mL)      | - | - | - | - | - | -  | -  | - |

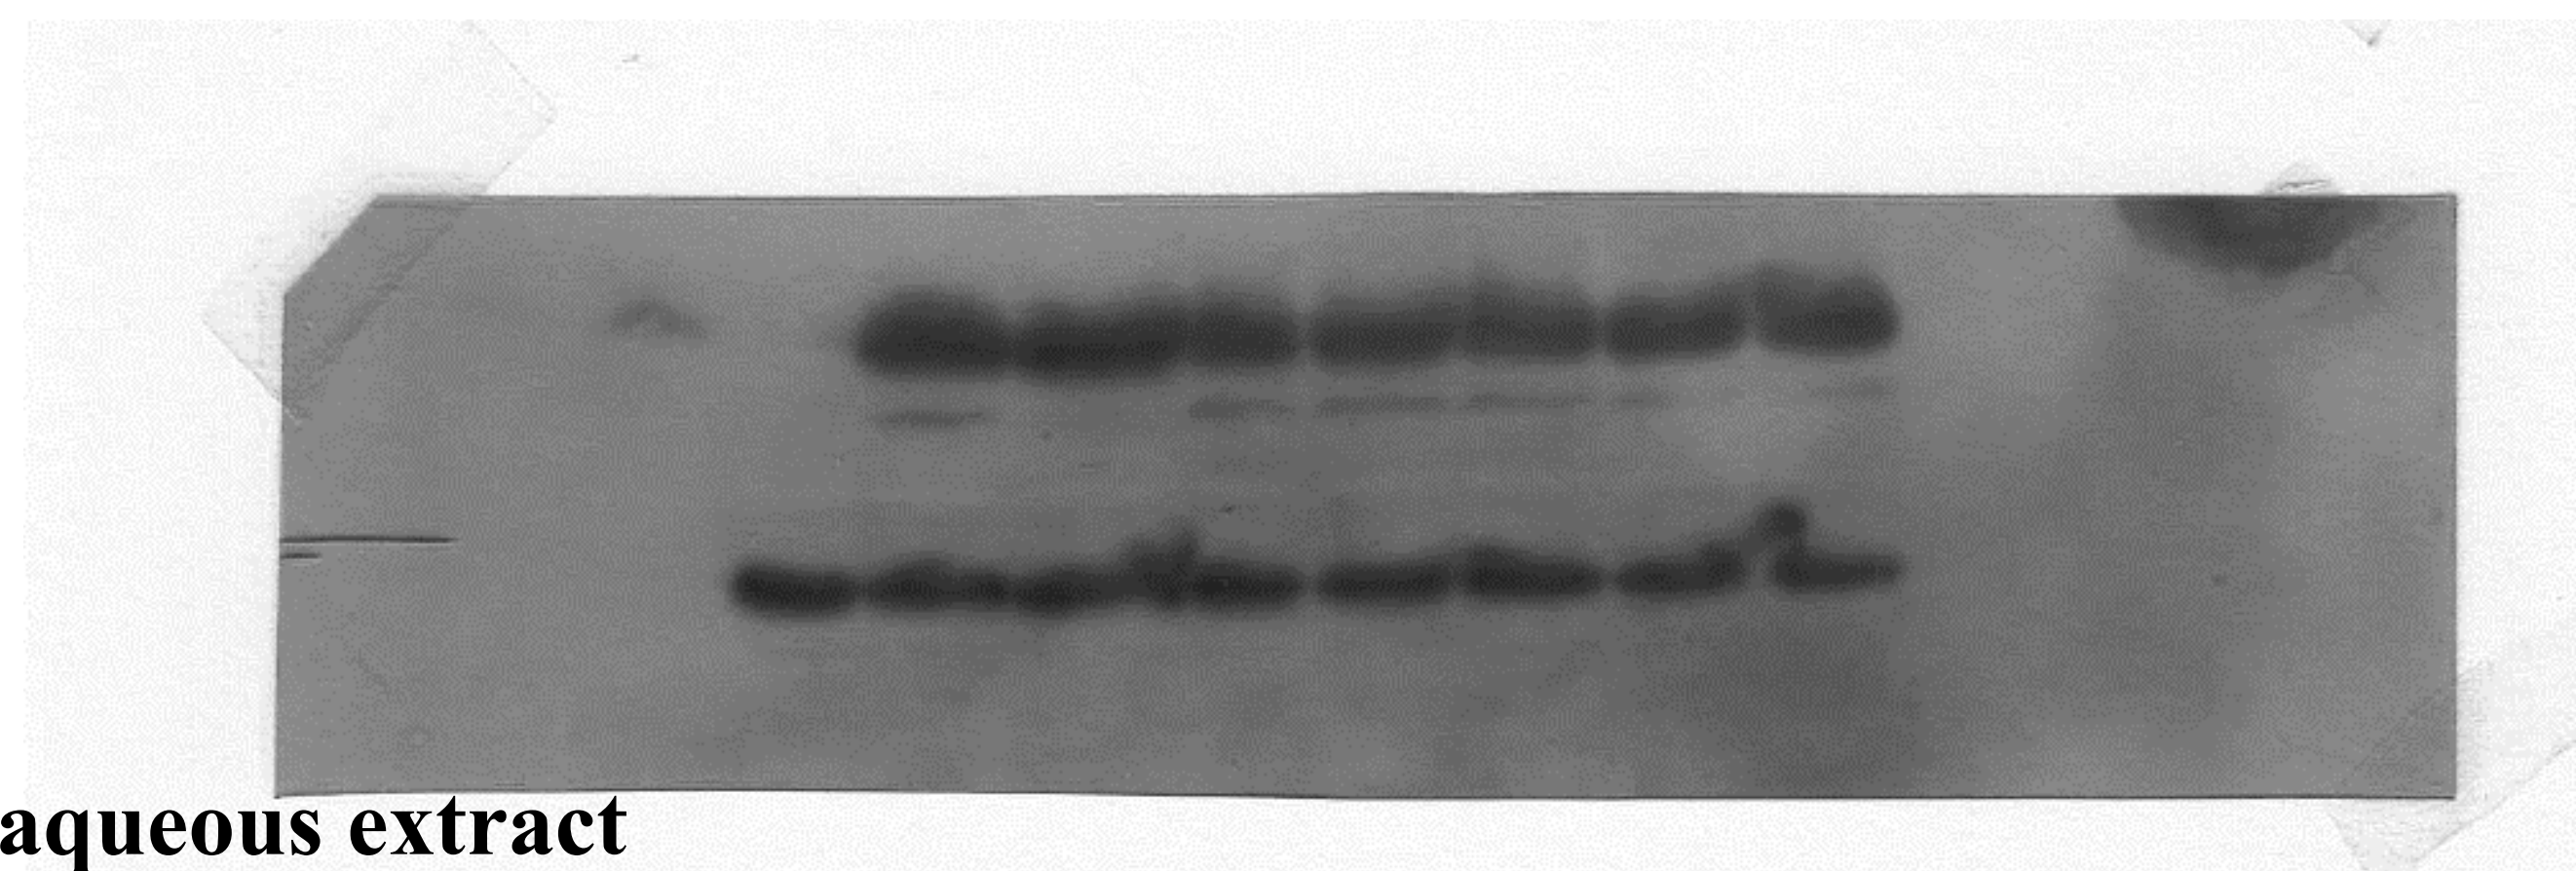

|                              |   |   |    |    |     |     |     |   |
|------------------------------|---|---|----|----|-----|-----|-----|---|
| HCFP aqueous extract (µg/mL) | - | - | 25 | 50 | 250 | 550 | 750 | - |
| LPS (1 µg/mL)                | - | + | +  | +  | +   | +   | +   | + |
| DCF (25 µg/mL)               | - | - | -  | -  | -   | -   | -   | + |

COX-2

B-Actin

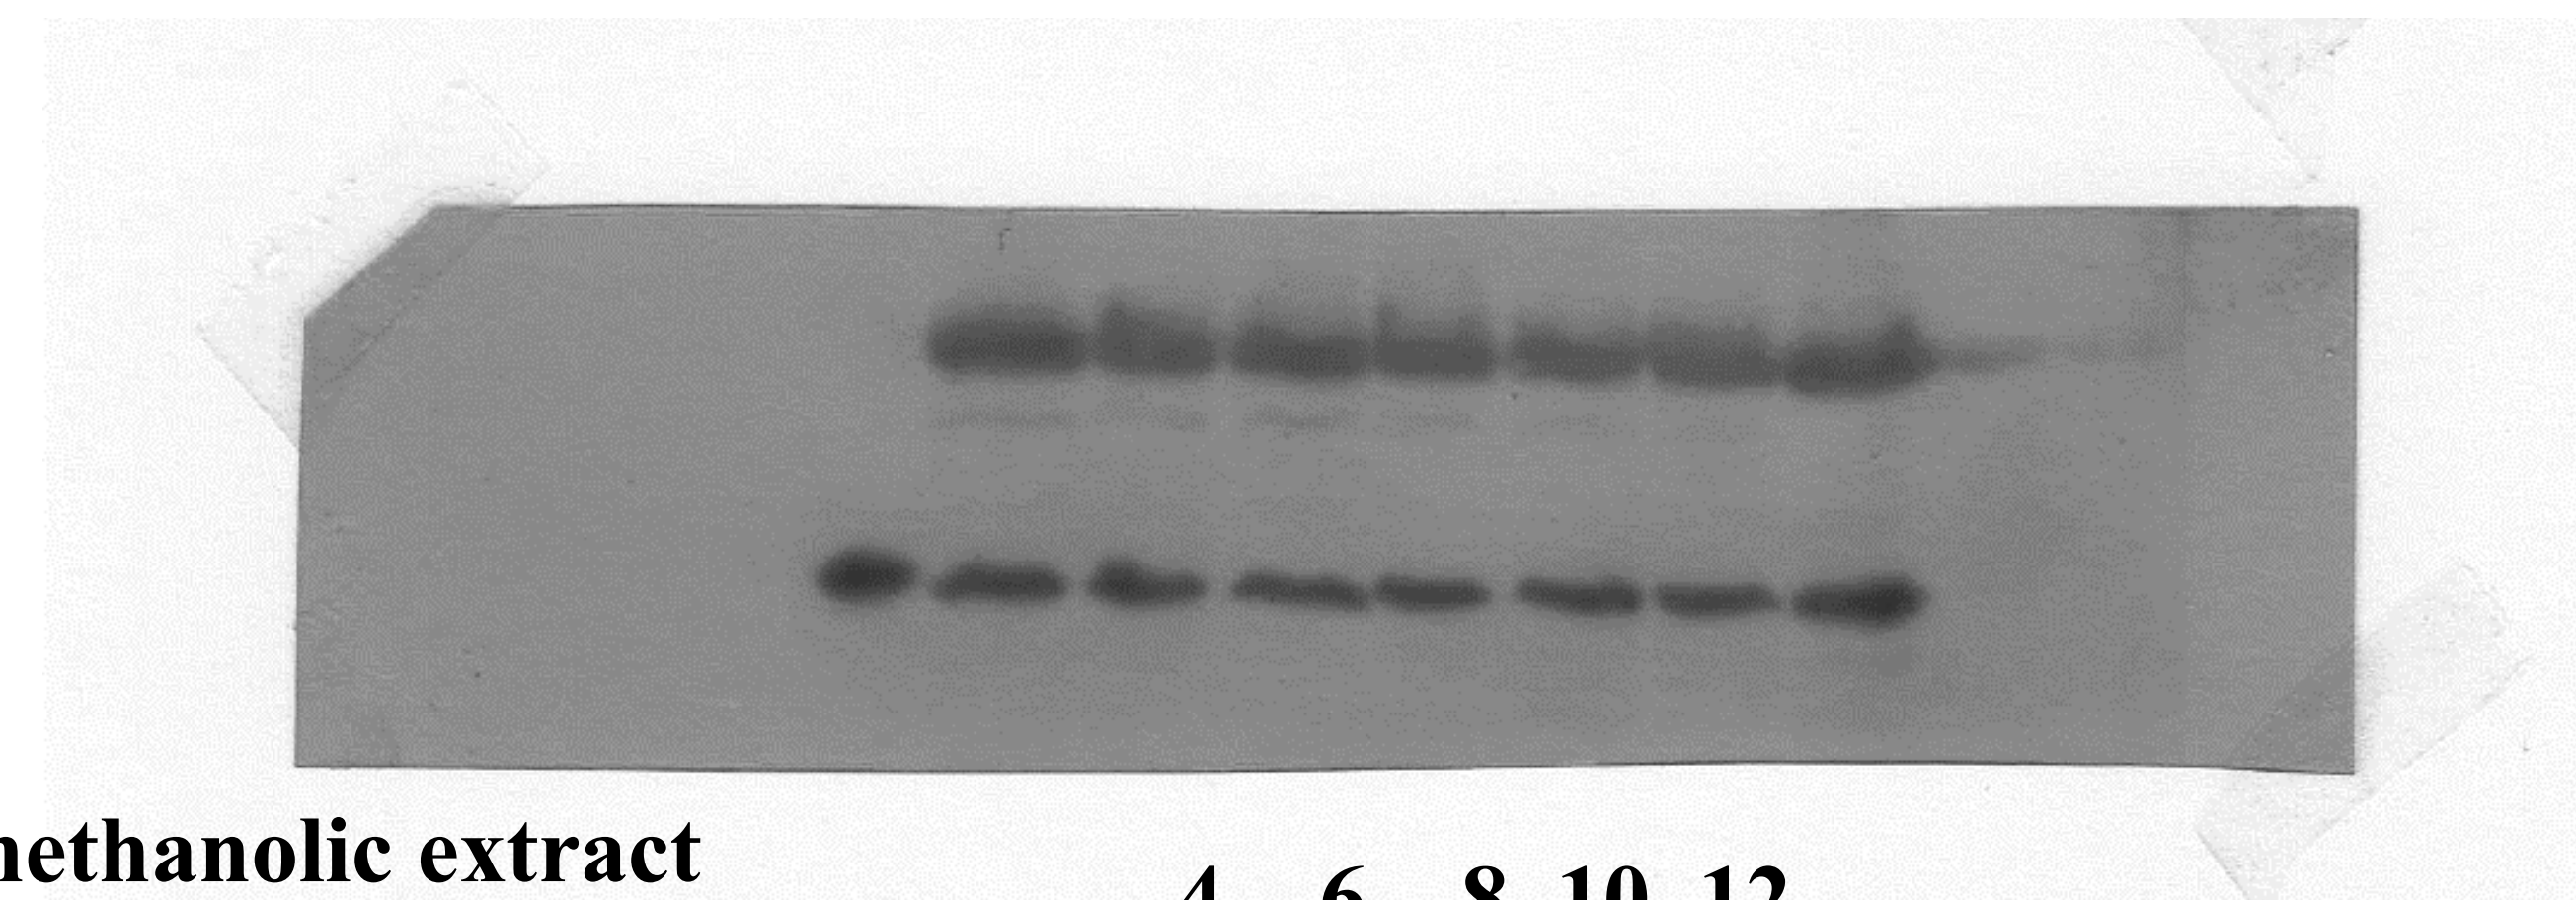

|                                 |   |   |   |   |   |    |    |   |
|---------------------------------|---|---|---|---|---|----|----|---|
| HCFP methanolic extract (µg/mL) | - | - | 4 | 6 | 8 | 10 | 12 | - |
| LPS (1 µg/mL)                   | - | + | + | + | + | +  | +  | + |
| DCF (25 µg/mL)                  | - | - | - | - | - | -  | -  | - |
